# Supplementary material for: Sarcopenia and risk of nonalcoholic fatty liver disease: A meta-analysis
Source: PubMed Central journal article supplement — Saudi J Gastroenterol. 2018 Jan-Feb;24(1):12–7. doi: 10.4103/sjg.SJG_237_17 (PMC5848318; doi:10.4103/sjg.sjg_237_17), 2018
Supplement: SJG-24-12_Suppl1.pdf [file SJG-24-12_Suppl1.pdf]

## SUPPLEMENTARY DATA 1

### Online Supplementary Data

#### *Search Strategy*

#### Database: Ovid MEDLINE

1. non-alcoholic fatty liver.mp. or exp non-alcoholic fatty liver/
2. non-alcoholic fatty liver.mp.
3. nonalcoholic steatohepatitis.mp.
4. non-alcoholic steatohepatitis.mp.
5. NASH.mp.
6. fatty liver.mp. or exp fatty liver/
7. nonalcoholic liver disease.mp.
8. non-alcoholic liver disease.mp.
9. or/1-8
10. sarcopenia.mp. or exp sarcopenia/
11. skeletal muscle.mp. or exp muscle, skeletal/
12. skeletal muscle mass.mp.
13. muscle atrophy.mp. or exp Muscular Atrophy/
14. lean body weight.mp.
15. or/10-14
16. 9 and 15

#### Database: EMBASE

1. nonalcoholic fatty liver.mp. or exp nonalcoholic fatty liver/
2. nonalcoholic steatohepatitis.mp.
3. NASH.mp.
4. fatty liver.mp. or exp fatty liver/
5. nonalcoholic fatty liver disease.mp.
6. or/1-5
7. sarcopenia.mp. or exp sarcopenia/
8. exp muscle mass/
9. skeletal muscle mass.mp.
10. exp muscle atrophy/
11. lean body weight.mp. or exp lean body weight/
12. or/7-11
13. 6 and 12
